# Supplementary material for: The Invasive Anemone Condylactis sp. of the Coral Reef as a Source of Sulfur- and Nitrogen-Containing Metabolites and Cytotoxic 5,8-Epidioxy Steroids
Source: MDPI journal article supplement (doi:10.3390/metabo13030392), 2023-03-07
Supplement: s1 [file s1]

## Supplementary Materials:

# **The Invasive *Anemone Condylactis* sp. of the Coral Reef as a Source of Sulfur- and Nitrogen-containing Metabolites and Cytotoxic 5,8-Epidioxy Steroids.**

**Atallah F. Ahmed<sup>1,2,3</sup>, Chang-Feng Dai<sup>4</sup>, Yao-Haur Kuo<sup>5</sup>, Jyh-Horng Sheu<sup>1,6,7,8,9,\*</sup>**

<sup>1</sup> Department of Marine Biotechnology and Resources, National Sun Yat-Sen University, Kaohsiung 804, Taiwan, Republic of China

<sup>2</sup> Department of Pharmacognosy, College of Pharmacy, King Saud University, Riyadh 11451, Saudi Arabia

<sup>3</sup> Department of Pharmacognosy, Faculty of Pharmacy, Mansoura University, Mansoura 35516, Egypt

<sup>4</sup> Institute of Oceanography, National Taiwan University, Taipei 106, Taiwan

<sup>5</sup> Division of Herbal Drugs and Natural Products, National Research Institute of Chines Medicine, Taipei 112, Taiwan

<sup>6</sup> Institute of Natural Products, Kaohsiung Medical University, Kaohsiung 807, Taiwan

<sup>7</sup> Department of Medical Research, China Medical University Hospital, China Medical University, Taichung 404, Taiwan

<sup>8</sup> Frontier Center for Ocean Science and Technology, National Sun Yat-sen University, Kaohsiung 804, Taiwan

<sup>9</sup> Doctoral Degree Program in Marine Biotechnology, National Sun Yat-sen University and Academia Sinica, Kaohsiung 804, Taiwan

## List of Supplementary material

| No.               | Content                                                                      | Page |
|-------------------|------------------------------------------------------------------------------|------|
| <b>Figure S1</b>  | HREIMS spectrum of <b>1</b> ( $M^+$ and major ion peaks)                     | S3   |
| <b>Figure S2</b>  | EIMS spectrum of <b>1</b>                                                    | S4   |
| <b>Figure S3</b>  | $^1\text{H}$ NMR spectrum of <b>1</b> in $\text{CDCl}_3$ at 300 MHz          | S4   |
| <b>Figure S4</b>  | $^{13}\text{C}$ NMR spectrum of <b>1</b> in $\text{CDCl}_3$ at 75 MHz        | S5   |
| <b>Figure S5</b>  | $^1\text{H}$ - $^1\text{H}$ COSY spectrum of <b>1</b> in $\text{CDCl}_3$     | S5   |
| <b>Figure S6</b>  | HSQC spectrum of <b>1</b> in $\text{CDCl}_3$                                 | S6   |
| <b>Figure S7</b>  | HMBC spectrum of <b>1</b> in $\text{CDCl}_3$                                 | S6   |
| <b>Figure S8</b>  | HREIMS spectrum of <b>2</b> ( $M^+$ and major ion peaks)                     | S7   |
| <b>Figure S9</b>  | EIMS spectrum of <b>2</b>                                                    | S8   |
| <b>Figure S10</b> | $^1\text{H}$ NMR spectrum of <b>2</b> in acetone- $d_6$ at 300 MHz           | S8   |
| <b>Figure S11</b> | $^{13}\text{C}$ NMR spectrum of <b>2</b> in acetone- $d_6$ at 75 MHz         | S9   |
| <b>Figure S12</b> | EIMS spectrum of <b>3</b>                                                    | S9   |
| <b>Figure S13</b> | $^1\text{H}$ NMR spectrum of <b>3</b> in acetone- $d_6$ at 300 MHz           | S10  |
| <b>Figure S14</b> | $^{13}\text{C}$ NMR spectrum of <b>3</b> in acetone- $d_6$ at 75 MHz         | S10  |
| <b>Figure S15</b> | EIMS spectrum of <b>4</b>                                                    | S11  |
| <b>Figure S16</b> | $^1\text{H}$ NMR spectrum of <b>4</b> in $\text{D}_2\text{O}$ at 300 MHz     | S11  |
| <b>Figure S17</b> | $^{13}\text{C}$ NMR spectrum of <b>4</b> in $\text{D}_2\text{O}$ at 75 MHz   | S12  |
| <b>Figure S18</b> | EIMS spectrum of <b>5</b>                                                    | S12  |
| <b>Figure S19</b> | $^1\text{H}$ NMR spectrum of <b>5</b> in $\text{CD}_3\text{OD}$ at 300 MHz   | S13  |
| <b>Figure S20</b> | $^{13}\text{C}$ NMR spectrum of <b>5</b> in $\text{CD}_3\text{OD}$ at 75 MHz | S13  |
| <b>Figure S21</b> | FABMS spectrum of <b>6</b>                                                   | S14  |
| <b>Figure S22</b> | $^1\text{H}$ NMR spectrum of <b>6</b> in $\text{DMSO}-d_6$ at 300 MHz        | S14  |
| <b>Figure S23</b> | $^{13}\text{C}$ NMR spectrum of <b>6</b> in $\text{DMSO}-d_6$ at 75 MHz      | S14  |
| <b>Figure S24</b> | $^1\text{H}$ NMR spectrum of <b>7</b> in $\text{CDCl}_3$ at 300 MHz          | S15  |
| <b>Figure S25</b> | $^1\text{H}$ NMR spectrum of <b>8</b> in $\text{CDCl}_3$ at 300 MHz          | S15  |
| <b>Figure S26</b> | $^1\text{H}$ NMR spectrum of <b>9</b> in $\text{CDCl}_3$ at 300 MHz          | S16  |
| <b>Figure S27</b> | $^1\text{H}$ NMR spectrum of <b>10</b> in $\text{CDCl}_3$ at 300 MHz         | S16  |

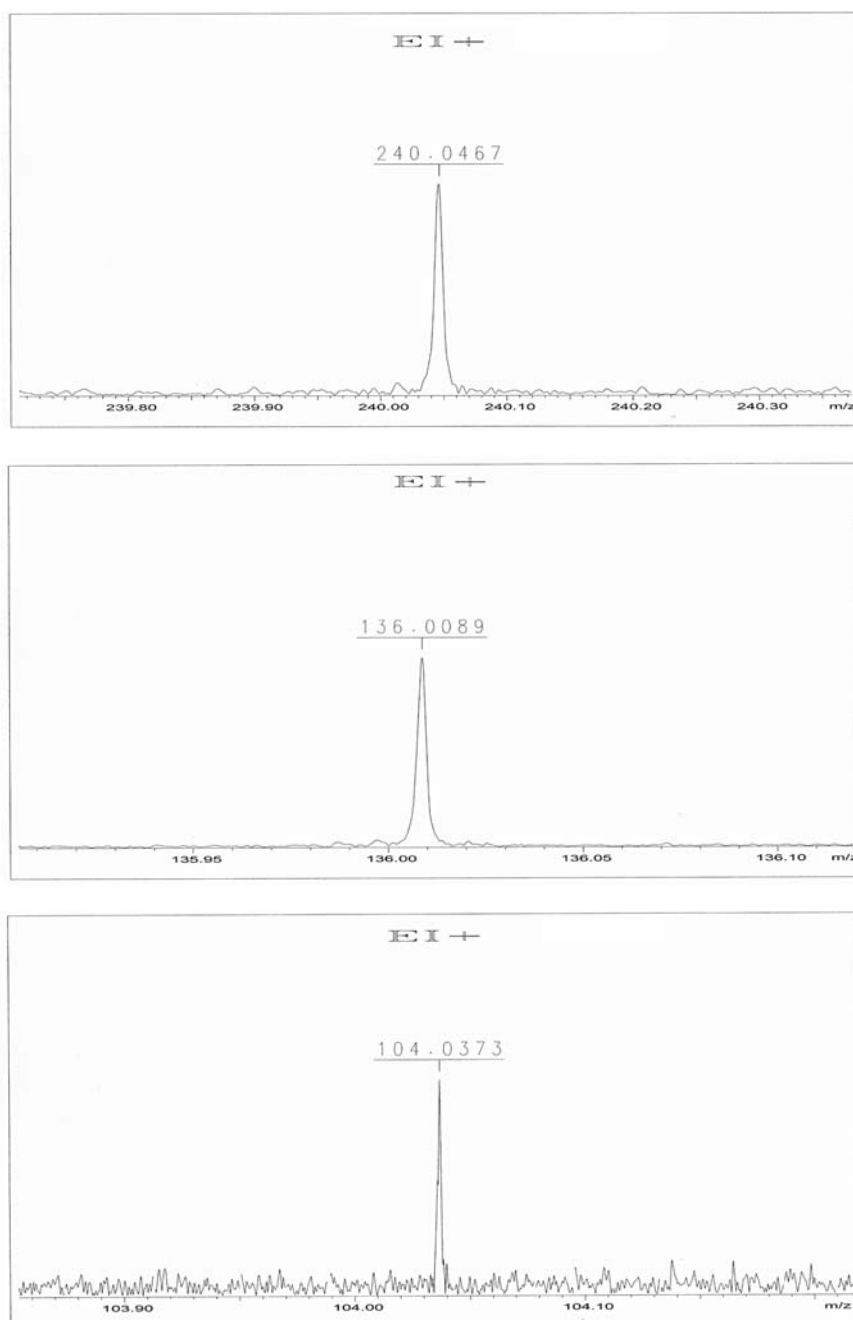

Figure S1. HREIMS spectrum of 1 ( $M^+$  and major ion peaks)

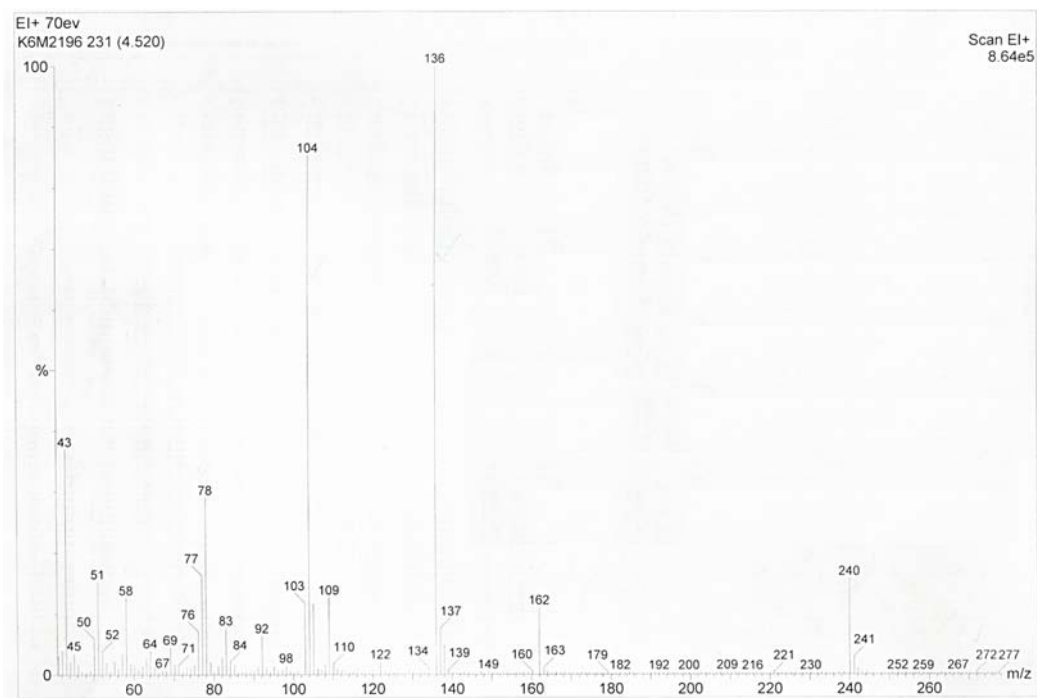

Figure S2. EIMS spectrum of 1

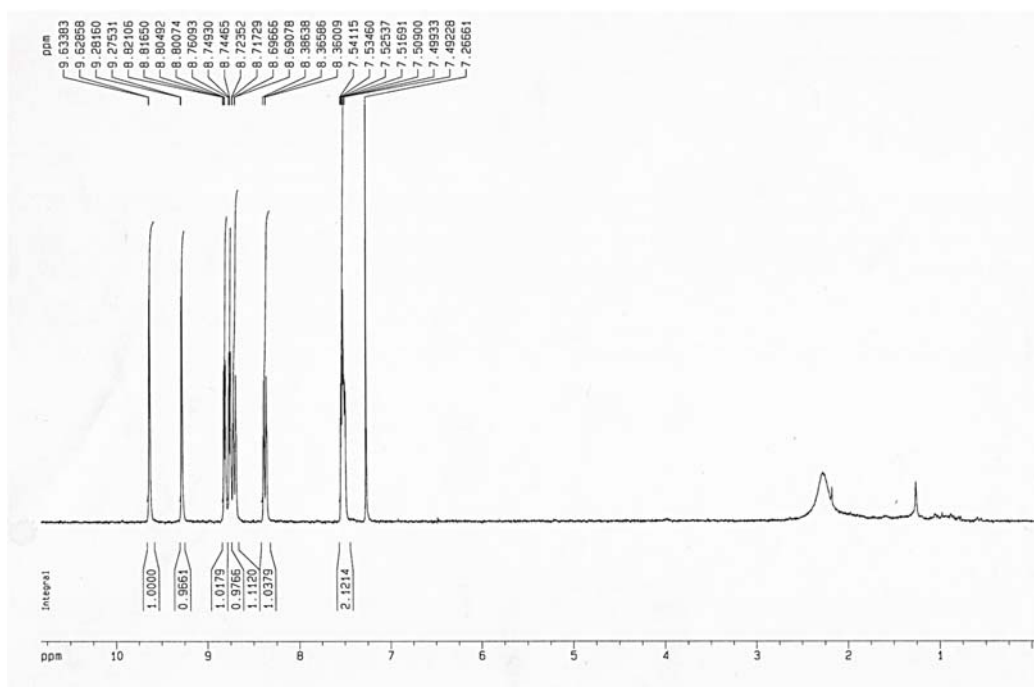Figure S3.  $^1\text{H}$  NMR spectrum of 1 in  $\text{CDCl}_3$  at 300 MHz

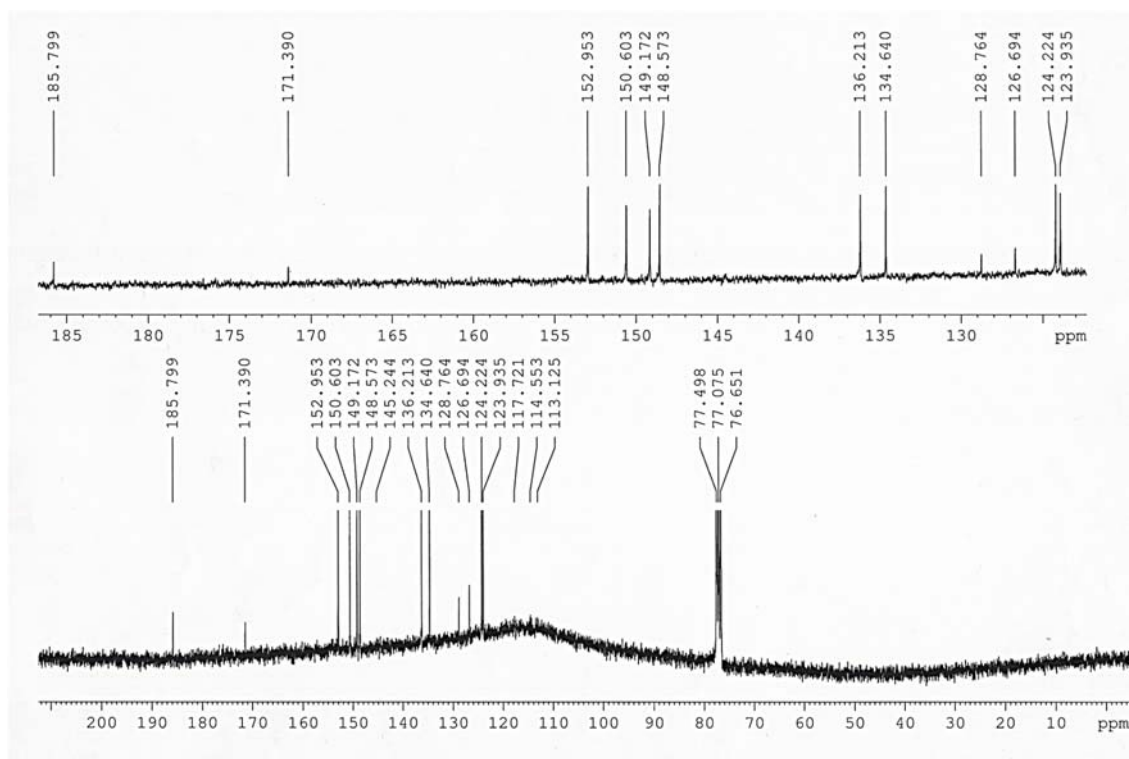

Figure S4. <sup>13</sup>C NMR spectrum of **1** in CDCl<sub>3</sub> at 75 MHz

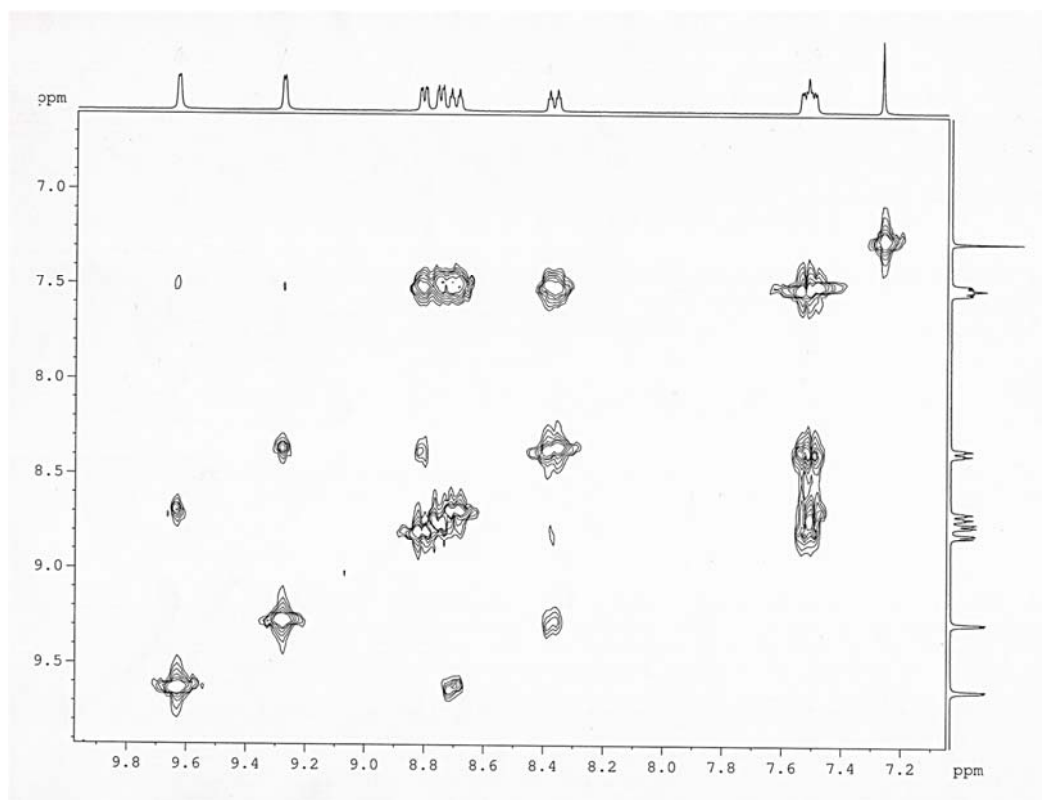

Figure S5. <sup>1</sup>H-<sup>1</sup>H COSY spectrum of **1** in CDCl<sub>3</sub>

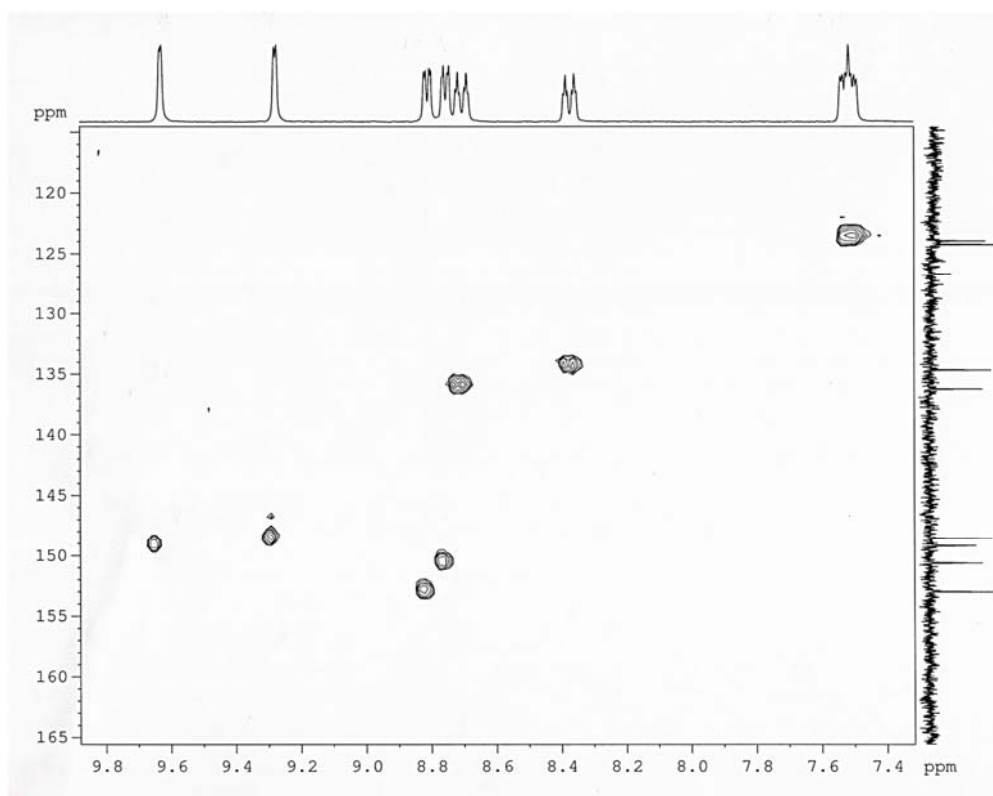

**Figure S6.** HSQC spectrum of **1** in CDCl<sub>3</sub>

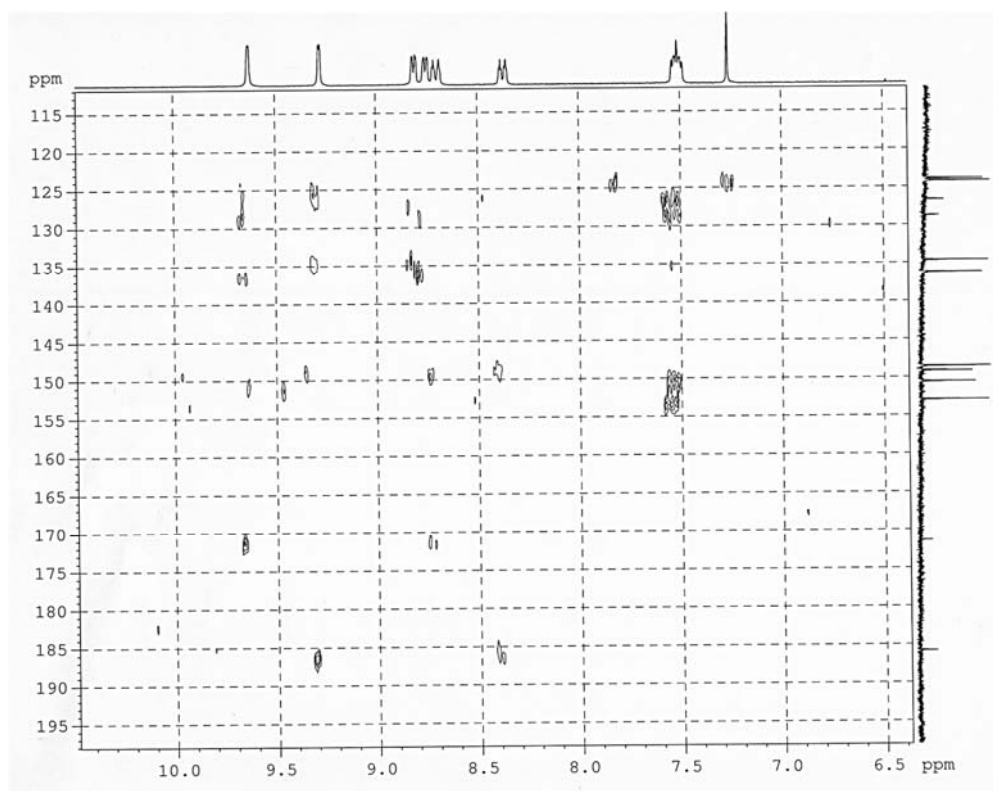

**Figure S7.** HMBC spectrum of **1** in CDCl<sub>3</sub>

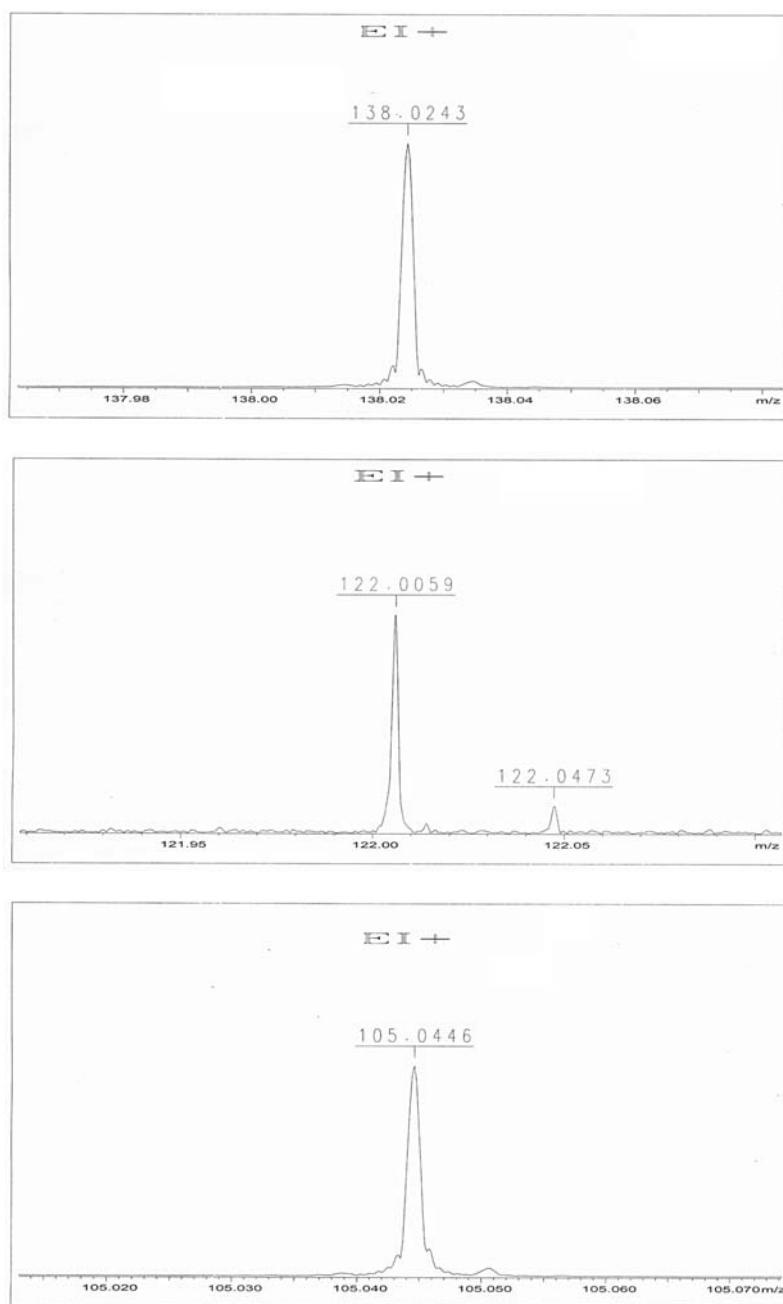

**Figure S8.** HREIMS spectrum of **2** ( $M^+$  and major ion peaks)

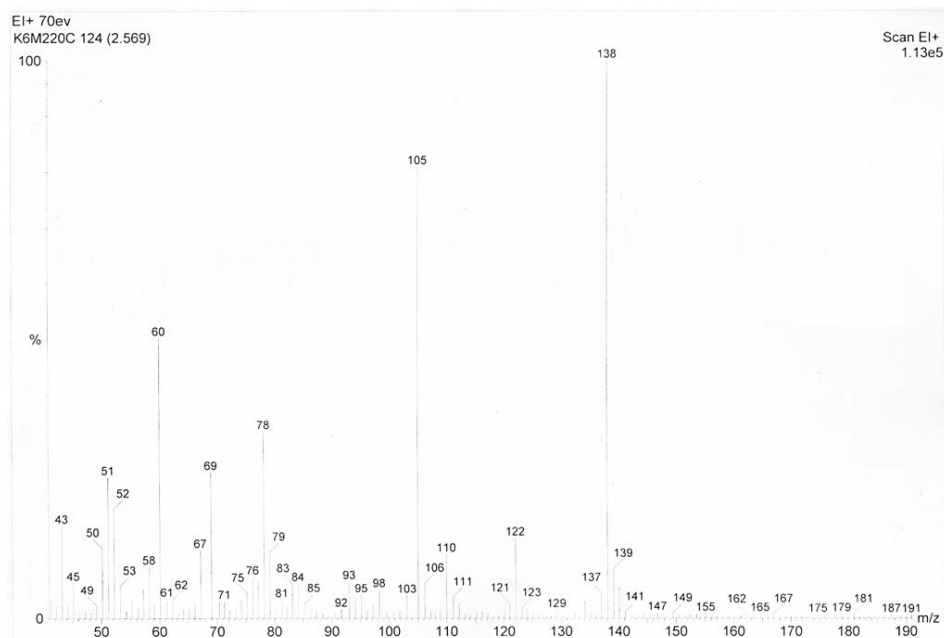Figure S9. EIMS spectrum of **2**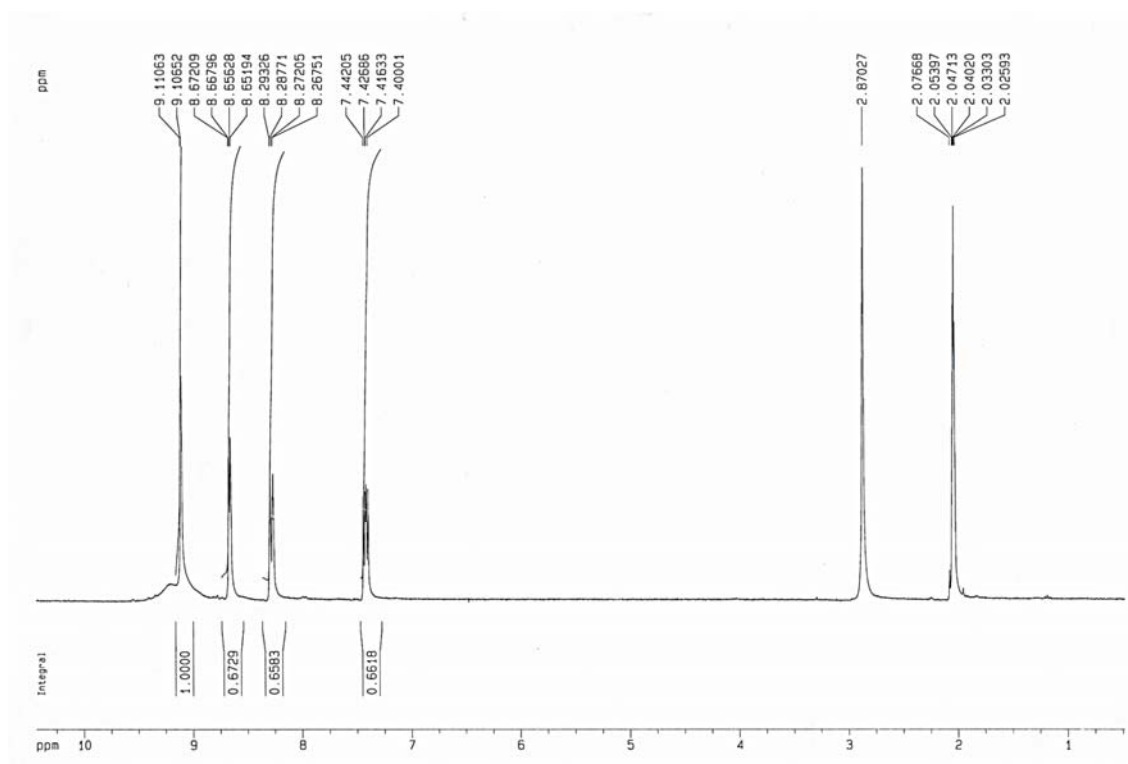Figure S10. <sup>1</sup>H NMR spectrum of **2** in acetone-*d*<sub>6</sub> at 300 MHz



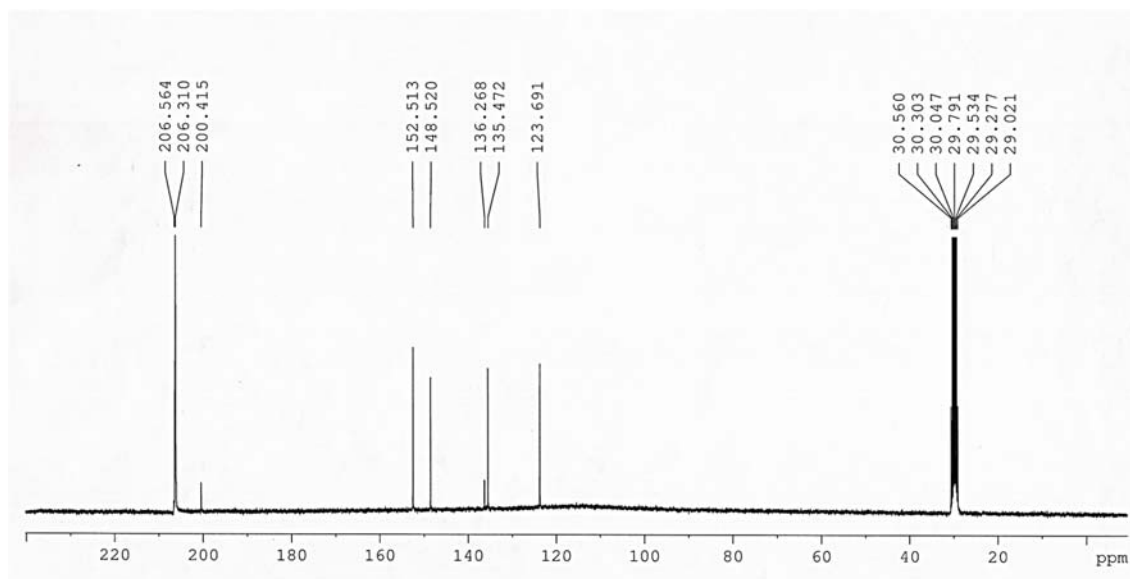

**Figure S11.** <sup>13</sup>C NMR spectrum of **2** in acetone-*d*<sub>6</sub> at 75 MHz

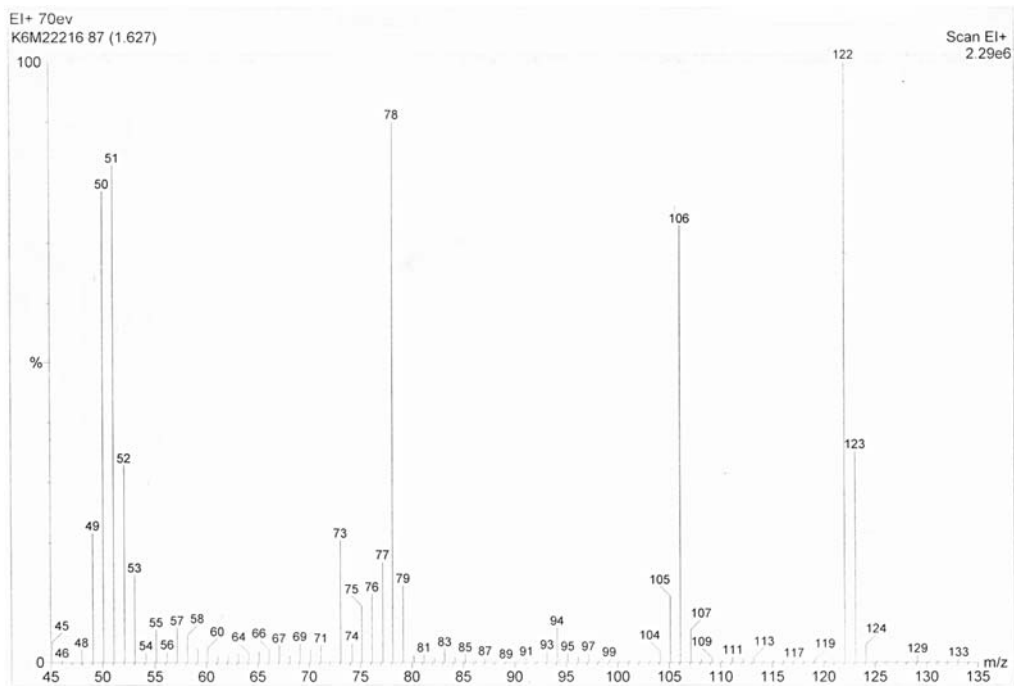

**Figure S12.** EIMS spectrum of **3**

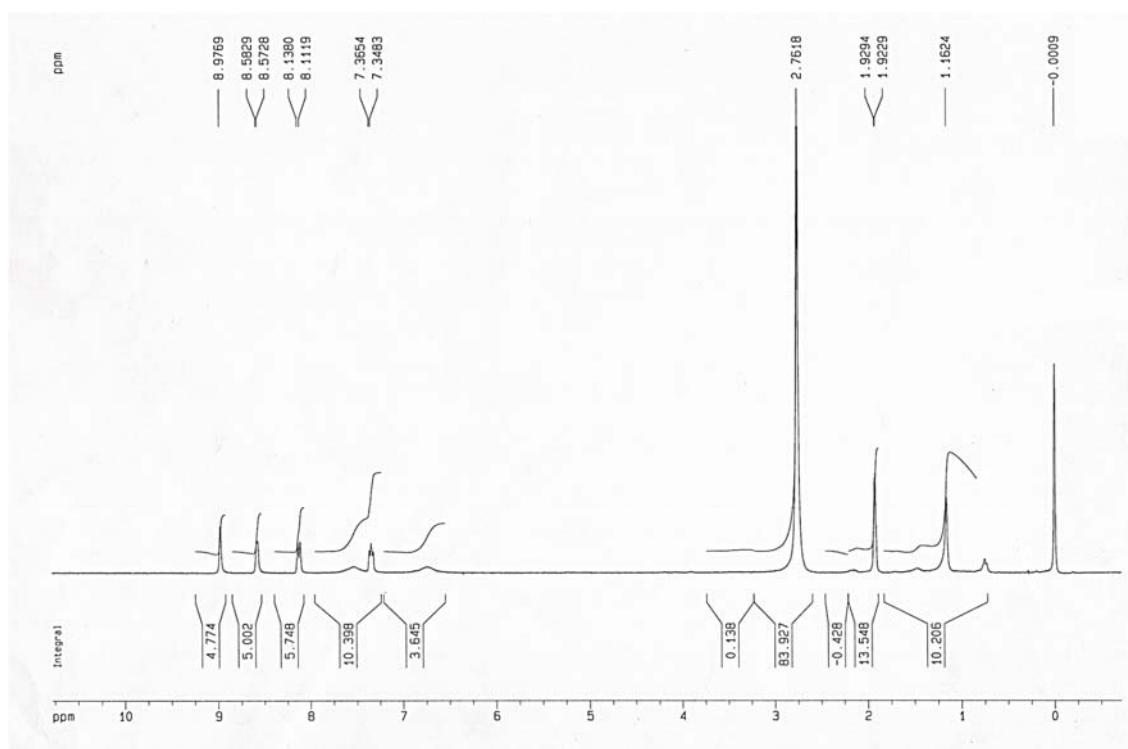

Figure S13. <sup>1</sup>H NMR spectrum of **3** in acetone-*d*<sub>6</sub> at 300 MHz

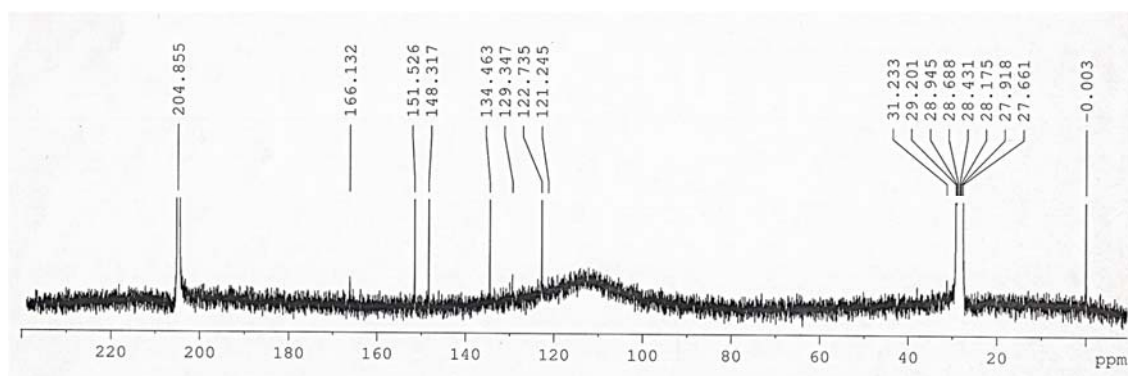

Figure S14. <sup>13</sup>C NMR spectrum of **3** in acetone-*d*<sub>6</sub> at 75 MHz

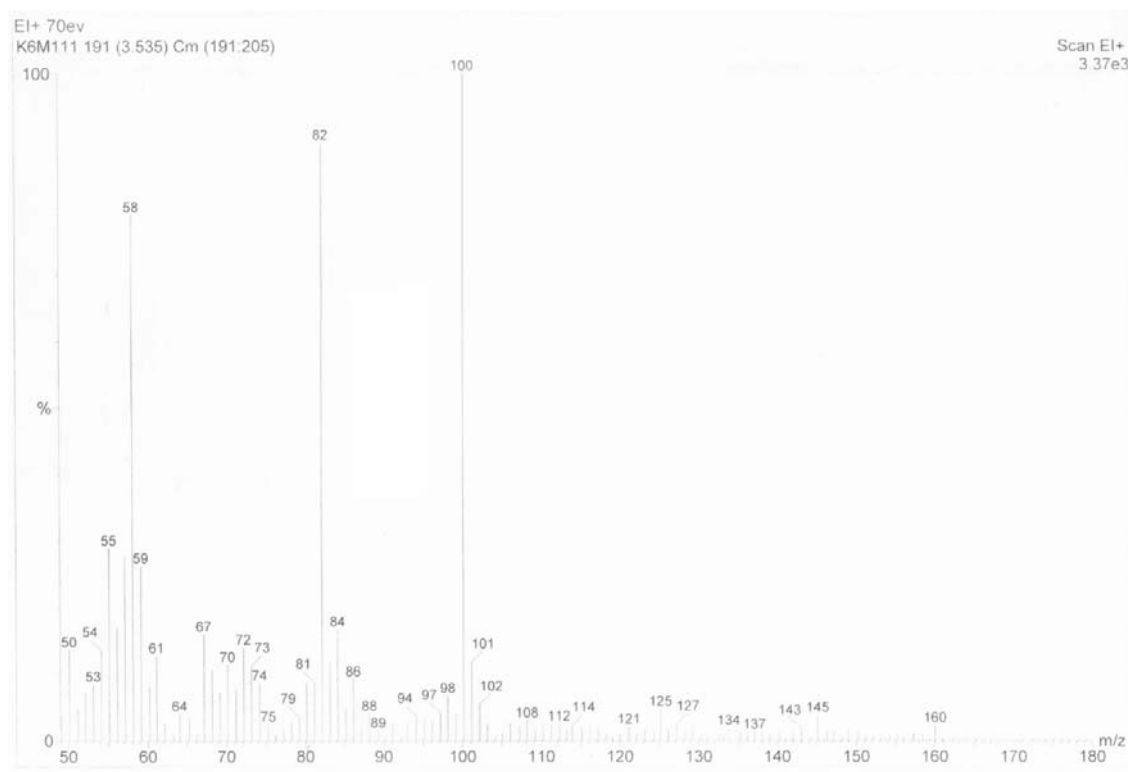

Figure S15. EIMS spectrum of **4**

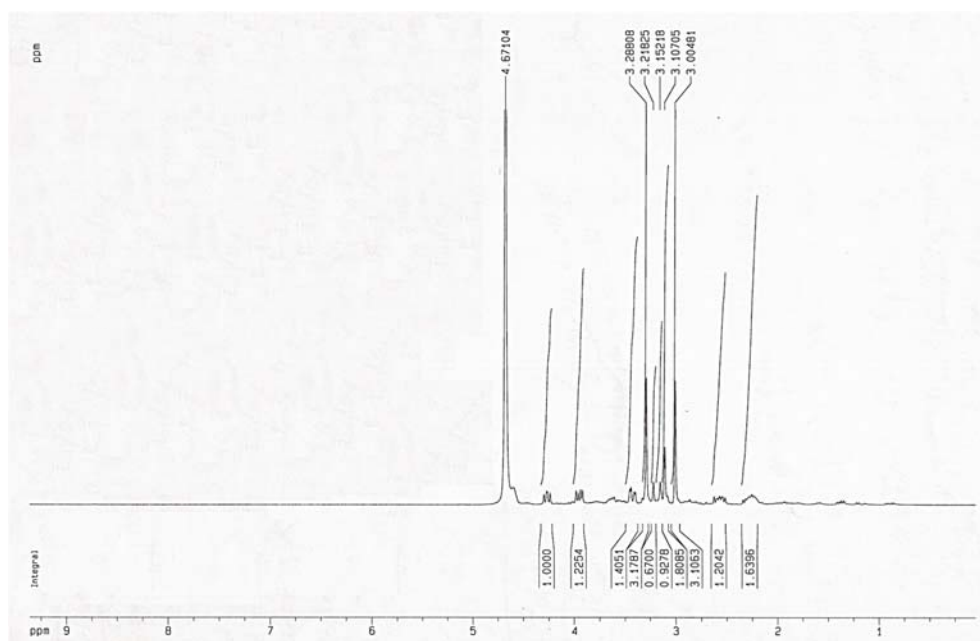

Figure S16.  $^1\text{H}$  NMR spectrum of **4** in  $\text{D}_2\text{O}$  at 300 MHz

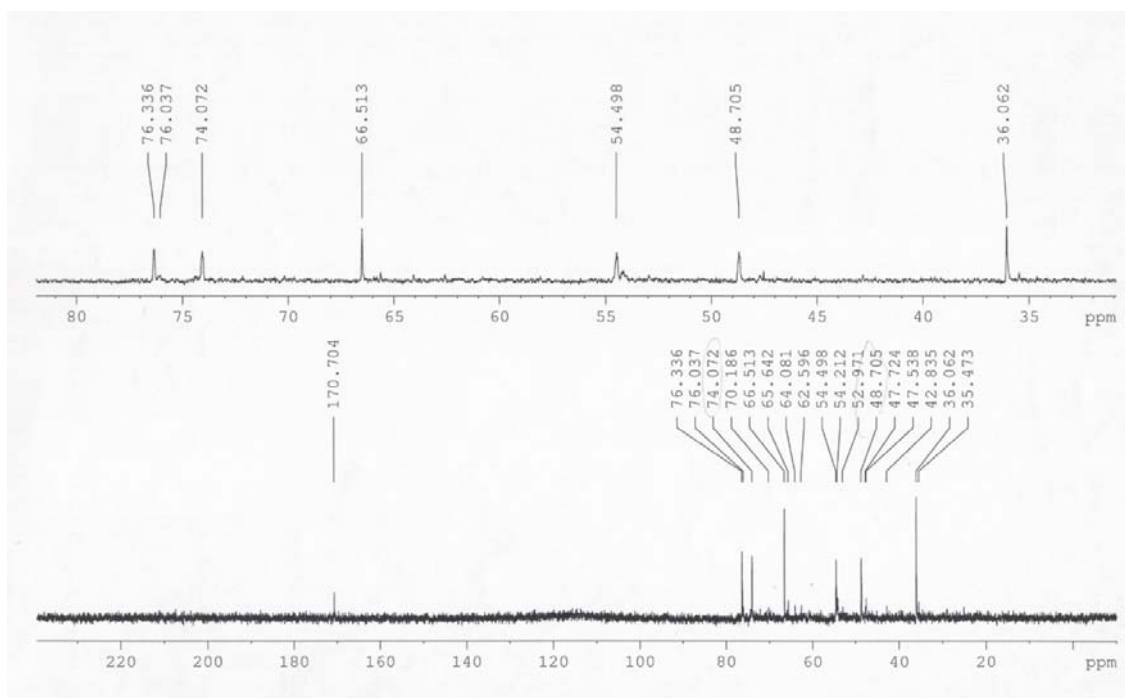

Figure S17.  $^{13}\text{C}$  NMR spectrum of **4** in  $\text{D}_2\text{O}$  at 75 MHz

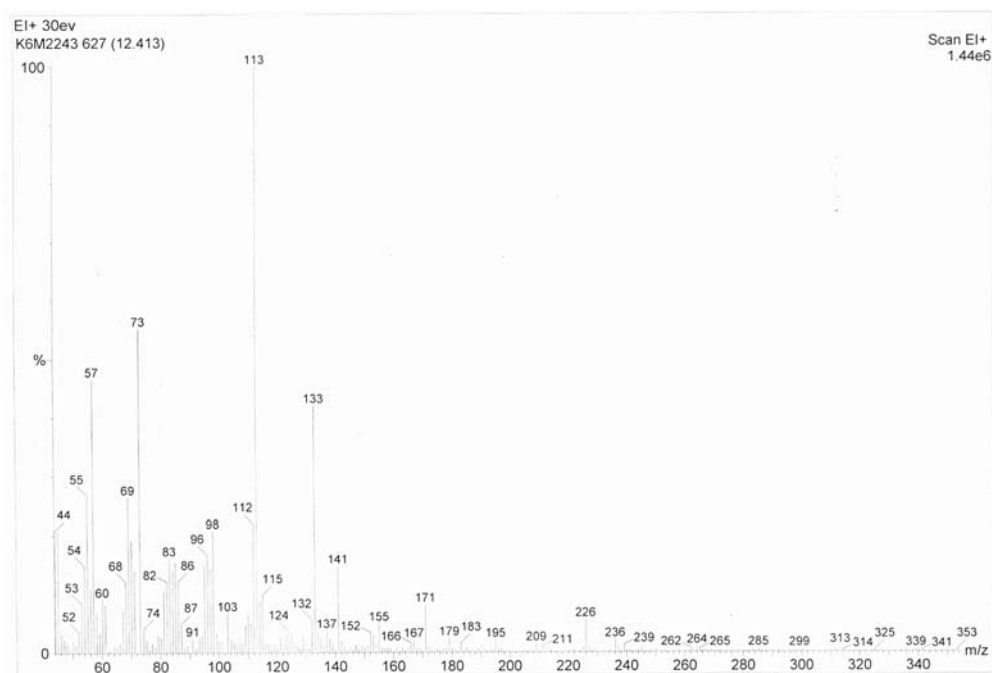

Figure S18. EIMS spectrum of **5**

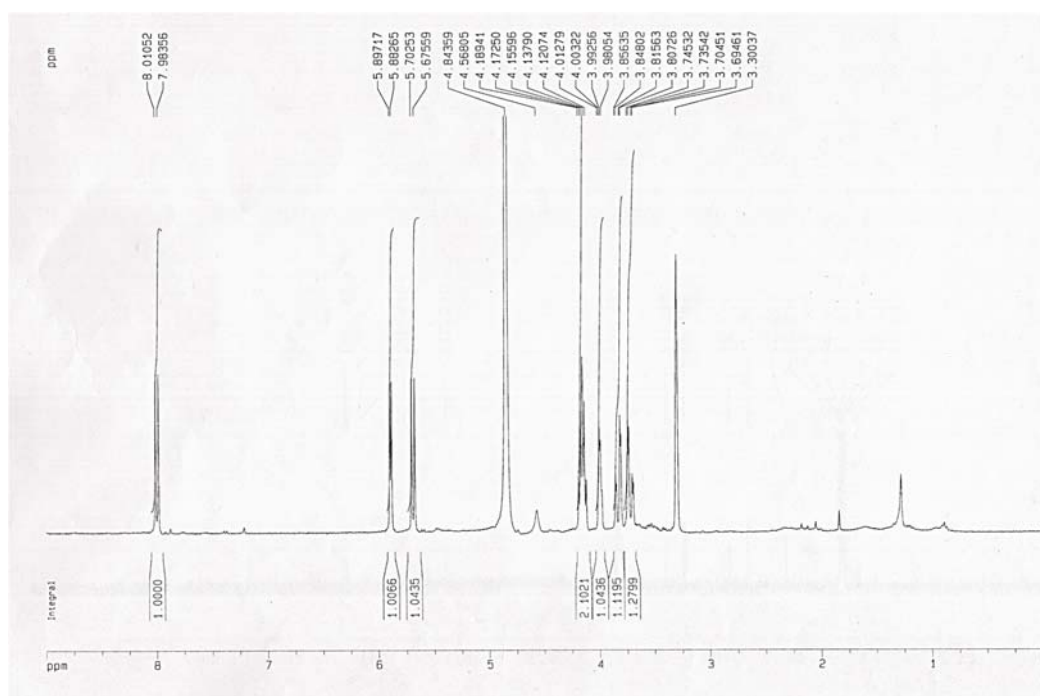

Figure S19. <sup>1</sup>H NMR spectrum of 5 in CD<sub>3</sub>OD at 300 MHz

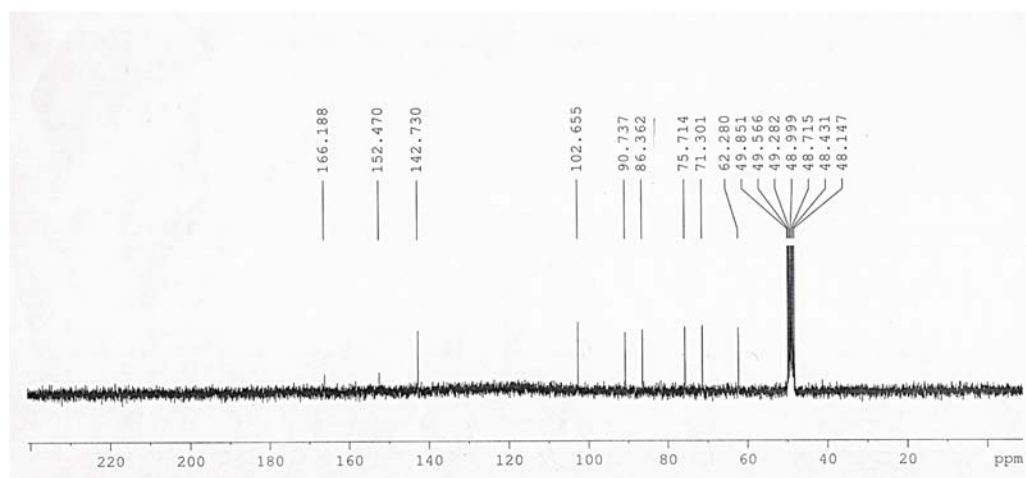

Figure S20. <sup>13</sup>C NMR spectrum of 5 in CD<sub>3</sub>OD at 75 MHz

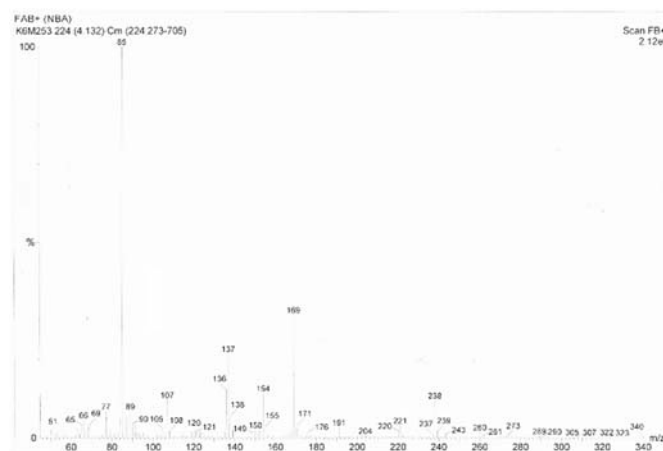

Figure S21. FAB/MS spectrum of **6**

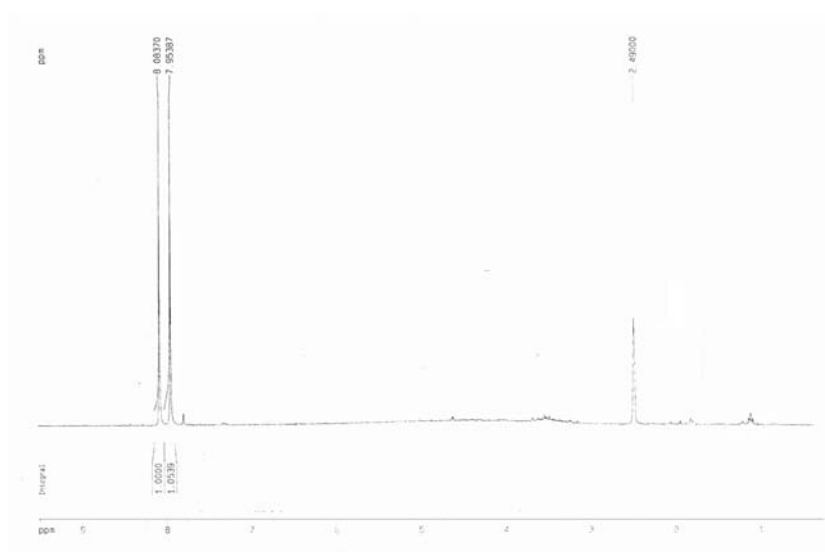

Figure S22.  $^1\text{H}$  NMR spectrum of **6** in  $\text{DMSO}-d_6$  at 300 MHz

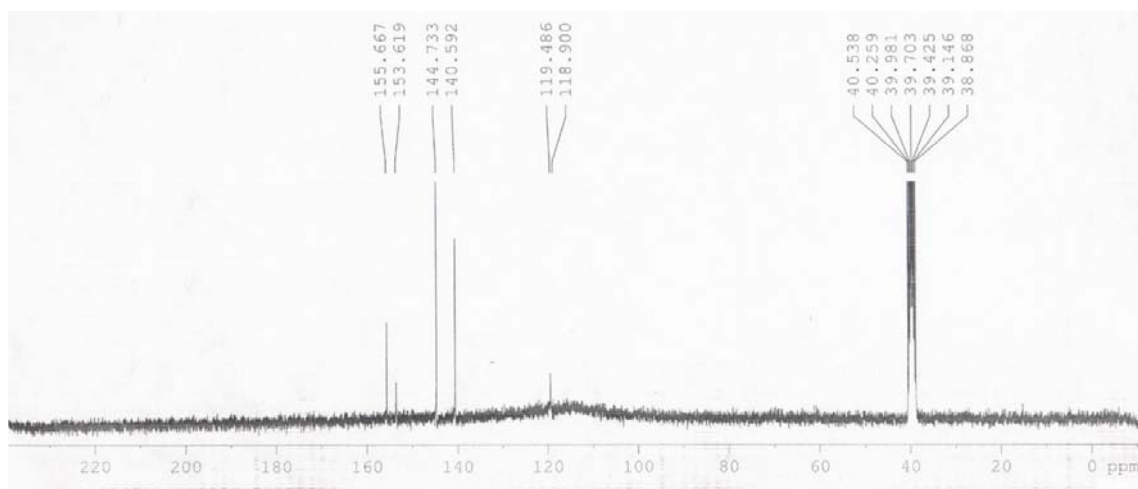

Figure S23.  $^{13}\text{C}$  NMR spectrum of **6** in  $\text{DMSO}-d_6$  at 75 MHz

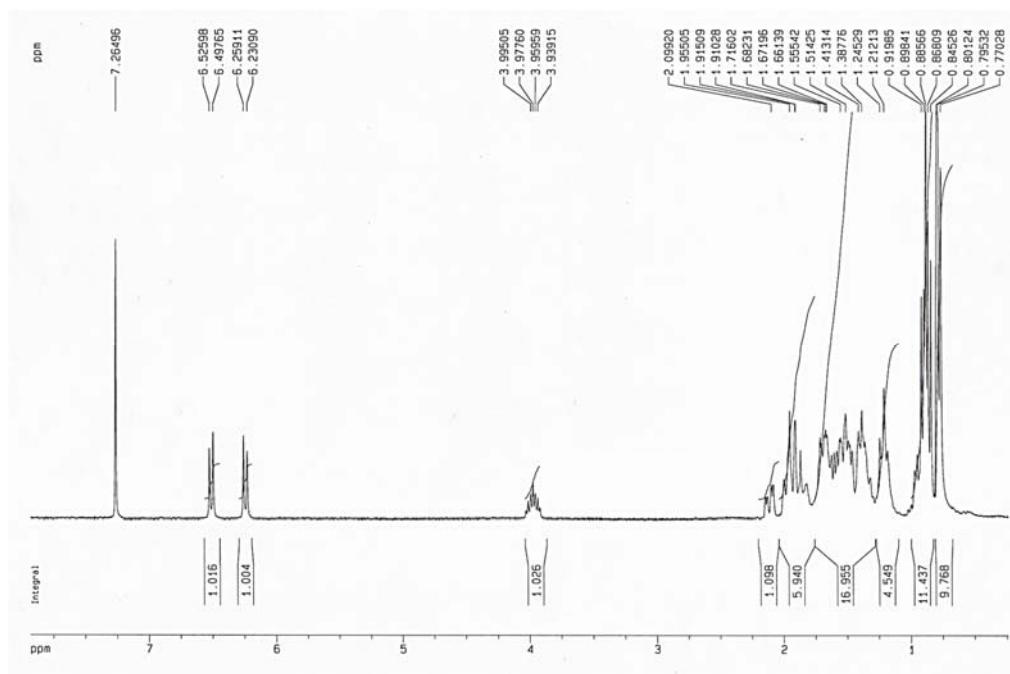Figure S24. <sup>1</sup>H NMR spectrum of **7** in CDCl<sub>3</sub> 300 MHz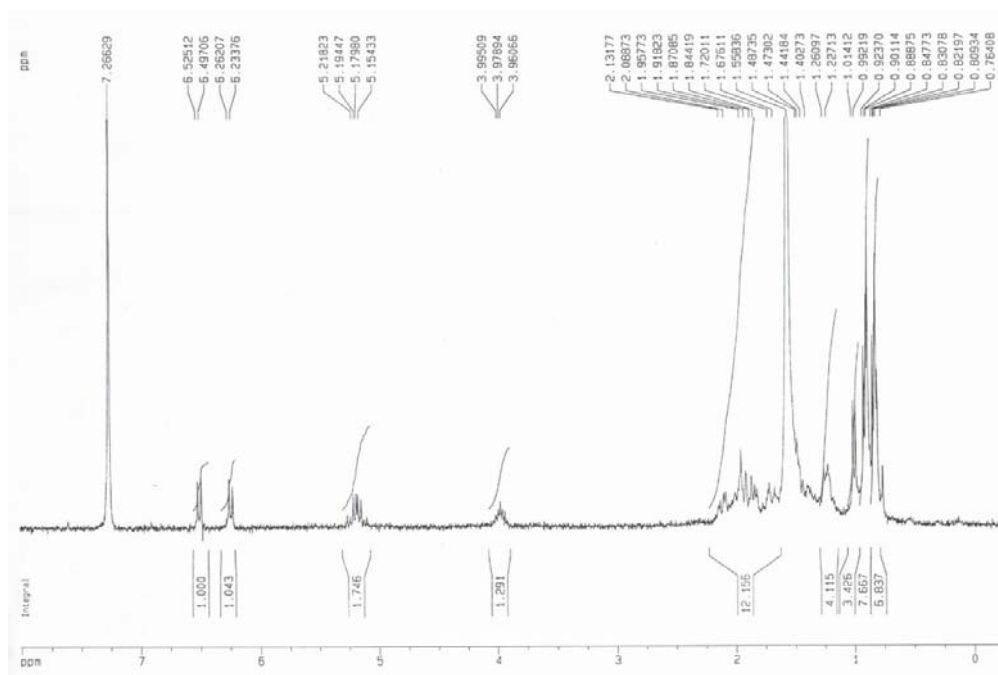Figure S25. <sup>1</sup>H NMR spectrum of **8** in CDCl<sub>3</sub> 300 MHz

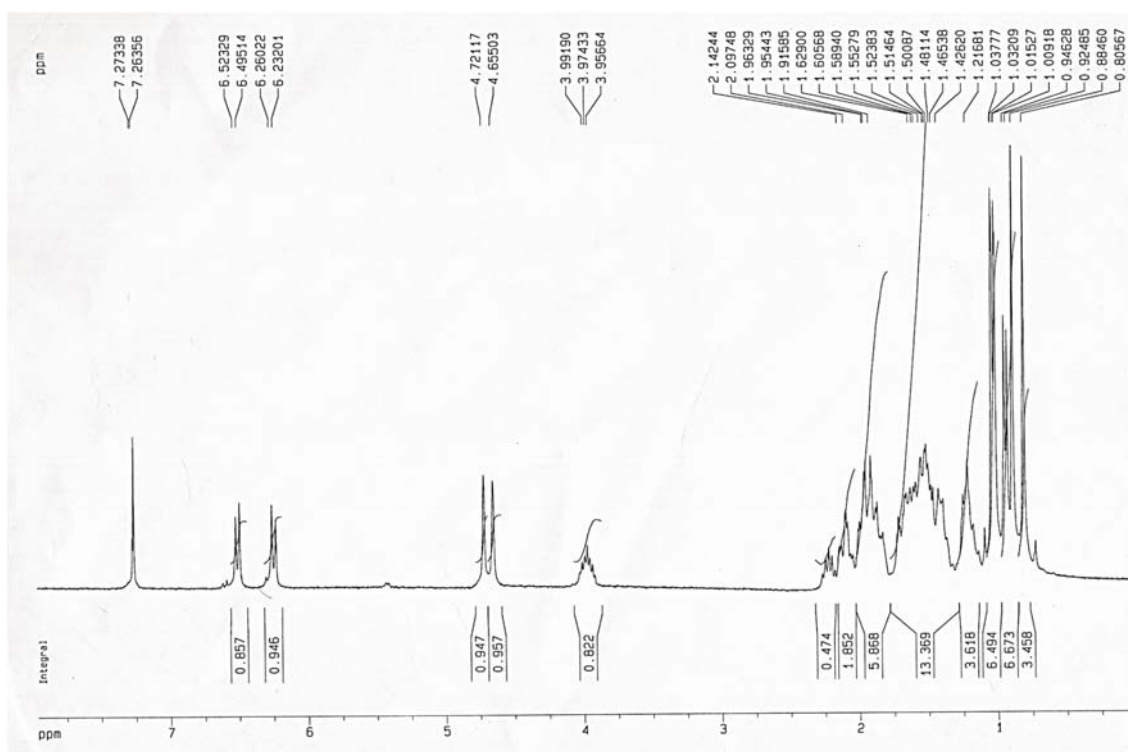Figure S26. <sup>1</sup>H NMR spectrum of **9** in CDCl<sub>3</sub> 300 MHz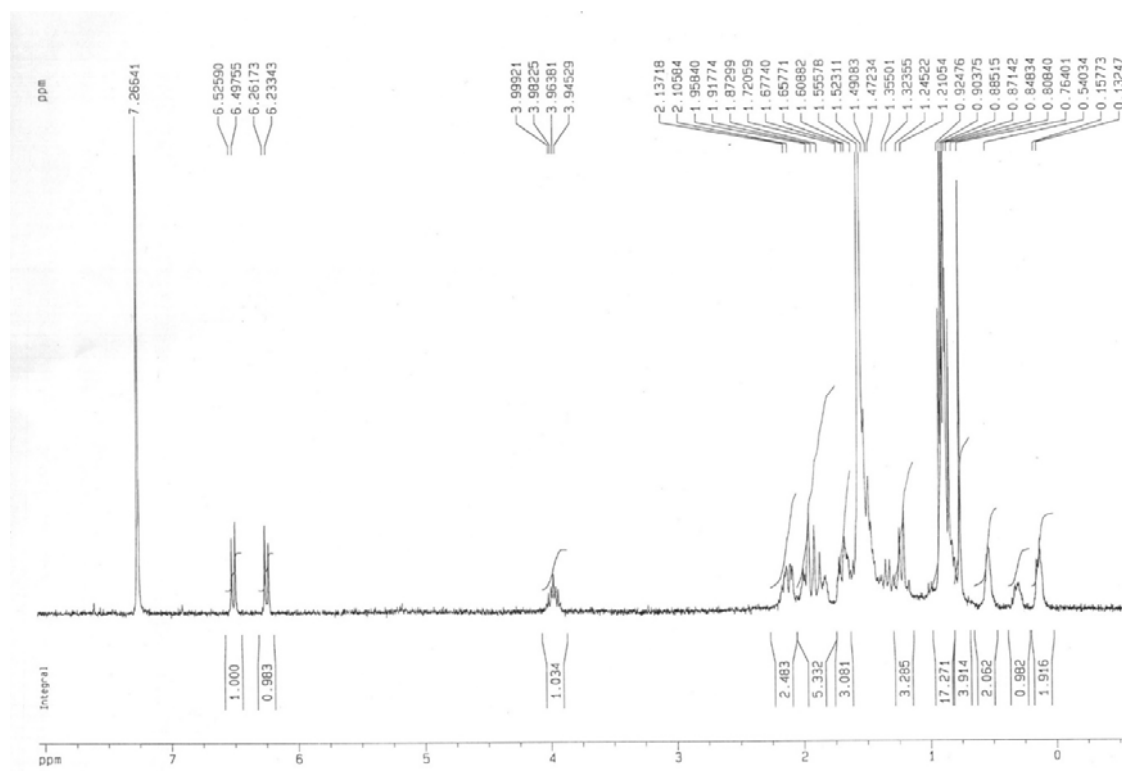Figure S27. <sup>1</sup>H NMR spectrum of **10** in CDCl<sub>3</sub> 300 MHz
